# Supplementary material
Source: PubMed Central journal article supplement (PMC7318080)
Supplement: oc0c00229_si_001.pdf [file oc0c00229_si_001.pdf]

## Supporting Information

### Deep Docking: A Deep Learning Platform for Augmentation of Structure Based Drug Discovery

Francesco Gentile<sup>†,‡</sup>, Vibudh Agrawal<sup>†,‡</sup>, Michael Hsing<sup>†</sup>, Anh-Tien Ton<sup>†</sup>, Fuqiang Ban<sup>†</sup>, Ulf Norinder<sup>¶,||</sup>, Martin E. Gleave<sup>†</sup>, Artem Cherkasov<sup>†,\*</sup>

<sup>†</sup>*Vancouver Prostate Centre, University of British Columbia, Vancouver, British Columbia, V6H3Z6, Canada*

<sup>¶</sup>*Swetox, Unit of Toxicology Sciences, Karolinska Institutet, Forskargatan 20, SE-151 36 Södertälje, Sweden*

<sup>||</sup>*Department of Computer and Systems Sciences, Stockholm University, Box 7003, SE-164 07 Kista, Sweden*

\*[acherkasov@prostatecentre.com](mailto:acherkasov@prostatecentre.com)

#### Table of Contents

|                                                                                                                                              |    |
|----------------------------------------------------------------------------------------------------------------------------------------------|----|
| Figure S1. Results of FRED docking of native ligands to their receptor structures.....                                                       | S2 |
| Figure S2. Precision of the <i>DD</i> models.....                                                                                            | S3 |
| Figure S3. Normalized differences between <i>DD</i> hits inferred from the test set and obtained by applying <i>DD</i> models to ZINC15..... | S3 |
| Table S1. Protein targets selected for evaluating <i>DD</i> .....                                                                            | S4 |
| Table S2. Number of active ligands obtained from DUD-E.....                                                                                  | S4 |
| Supplementary references.....                                                                                                                | S5 |

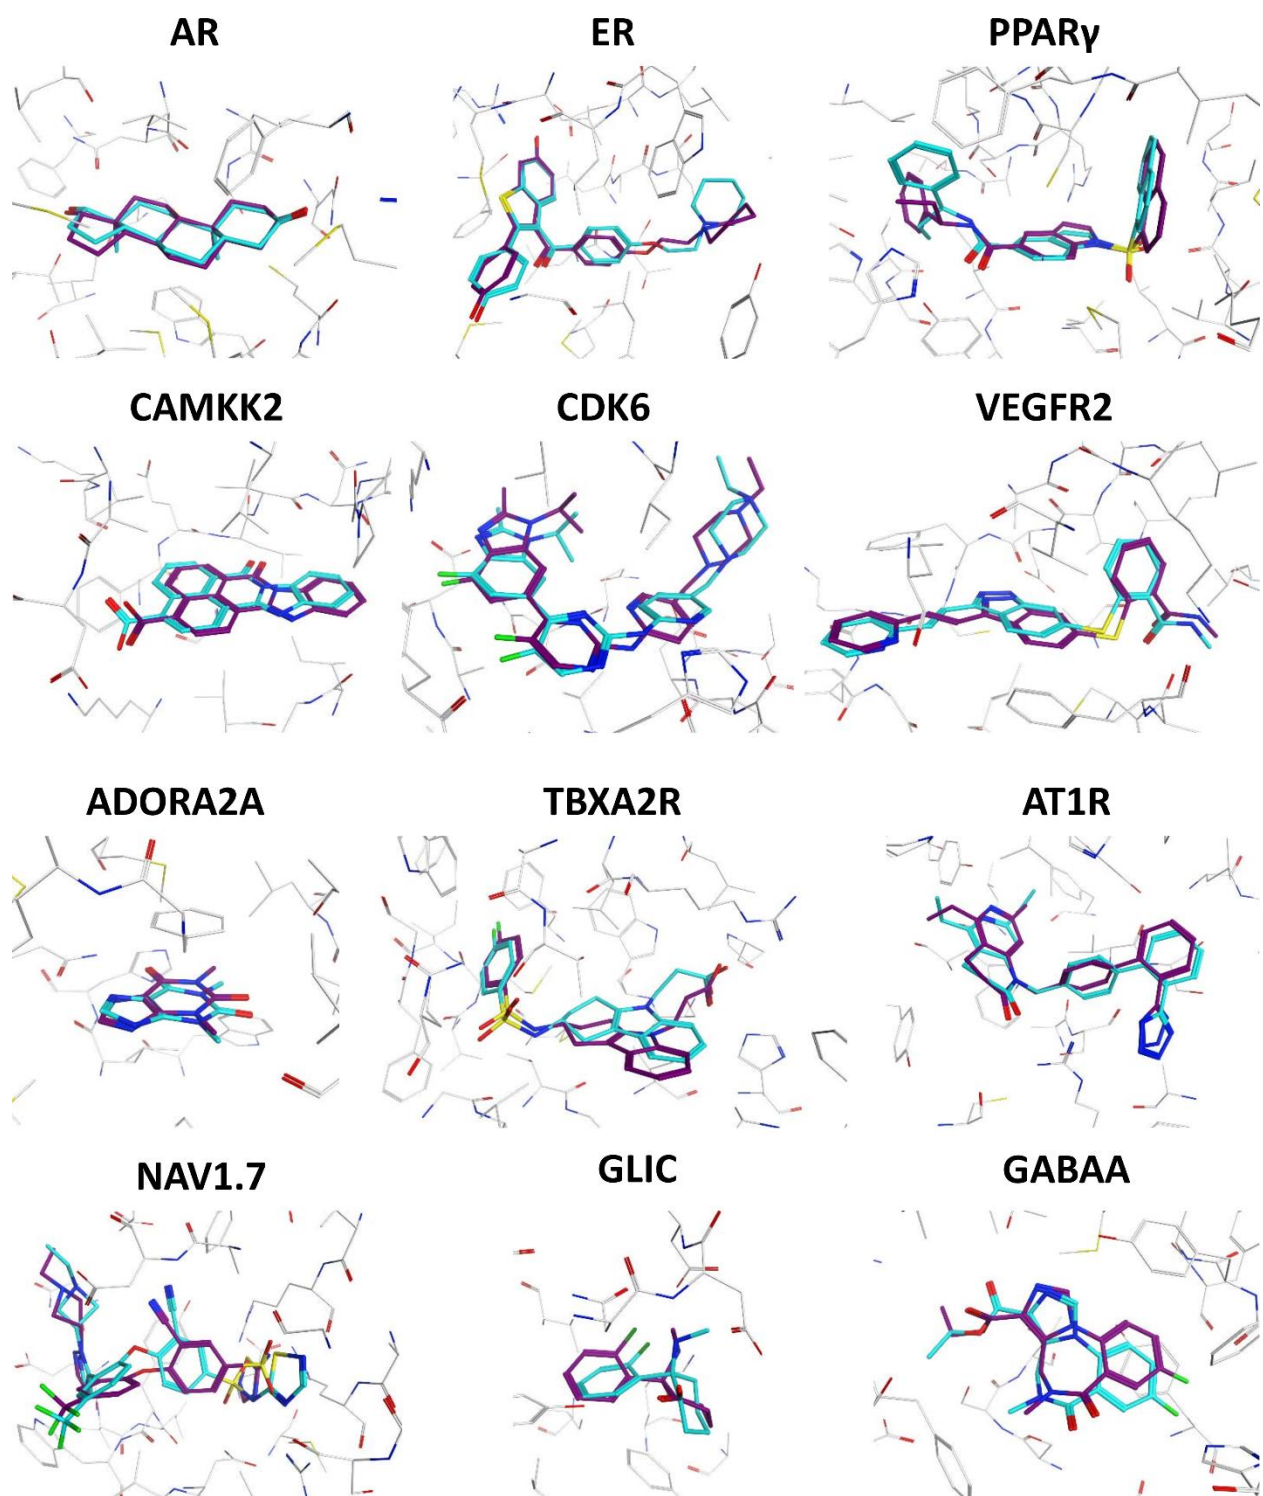

**Figure S1.** Results of FRED docking of native ligands to their receptor structures. Superposition of x-ray binding poses (cyan carbons) and docking poses (purple carbons) of the ligands for the 12 investigated systems.

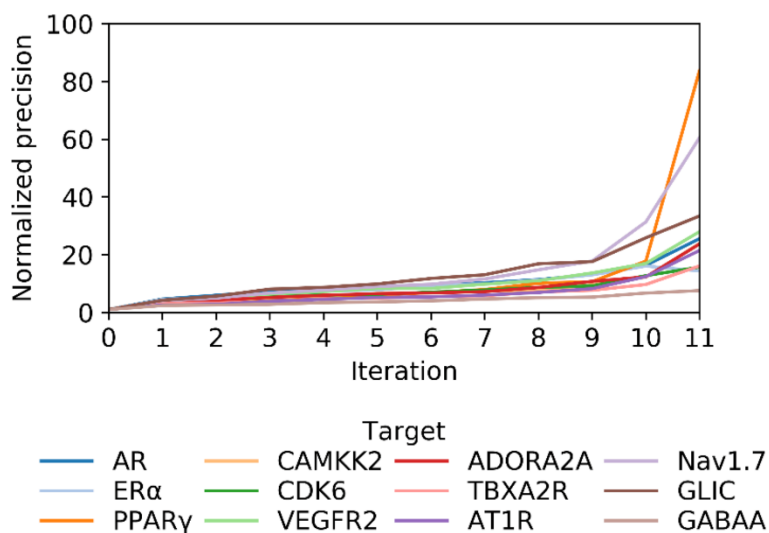

**Figure S2.** Normalized precision of *DD* models for molecules scoring below the score cutoff of the last iteration in random 1 million molecules sampled at each iteration. Values are normalized by dividing them by initial values (percentages of virtual hits in the entire ZINC15 database, random precisions).

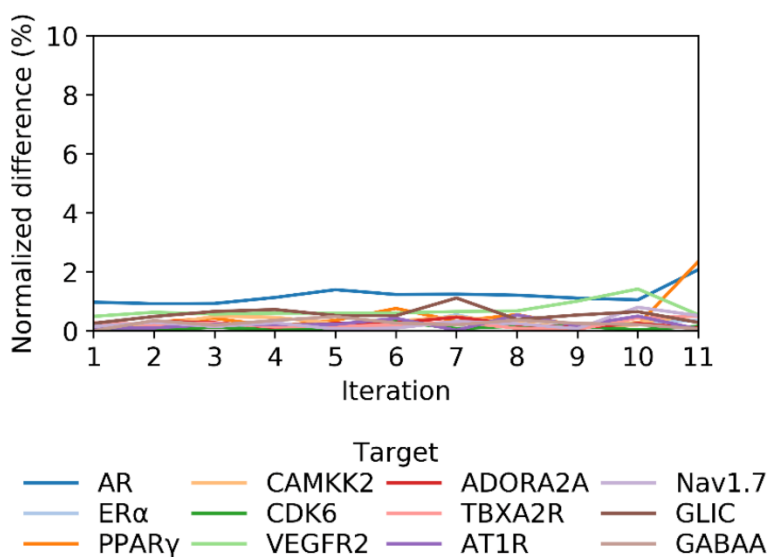

**Figure S3.** Normalized differences between number of *DD* hits inferred from the test set and obtained by applying *DD* models to ZINC15, calculated as  $\frac{|hits_{test} - hits_{real}|}{\min(hits_{test}, hits_{real})} \cdot 100$

**Table S1.** Protein targets selected for evaluating *DD*.

| Family                      | Target        | Ligand              | PDB                | Resolution (Å) | Therapeutic Significance                                                                        |
|-----------------------------|---------------|---------------------|--------------------|----------------|-------------------------------------------------------------------------------------------------|
| Nuclear receptors           | AR            | Dihydrotestosterone | 1T7R <sup>1</sup>  | 1.40           | Prostate Cancer <sup>2</sup>                                                                    |
|                             | ER $\alpha$   | Raloxifene          | 1ERR <sup>3</sup>  | 2.60           | Breast cancer, osteoporosis, menopausal symptoms <sup>2</sup>                                   |
|                             | PPAR $\gamma$ | SR-2067             | 4R06 <sup>4</sup>  | 2.22           | Diabetes <sup>2</sup>                                                                           |
| Kinases                     | CAMKK2        | STO-609             | 2ZV2 <sup>5</sup>  | 2.40           | Prostate cancer, metabolic hepatic diseases <sup>5-6</sup>                                      |
|                             | CDK6          | Abemaciclib         | 5L2S <sup>7</sup>  | 2.27           | Breast cancer <sup>8</sup>                                                                      |
|                             | VEGFR2        | Axitinib            | 4AG8 <sup>9</sup>  | 1.95           | Multiple cancer types <sup>8</sup>                                                              |
| G protein-coupled receptors | ADORA2A       | Theophylline        | 5MZJ <sup>10</sup> | 2.00           | Myocardial perfusion imaging, inflammation, neuropathic pain, Parkinson's disease <sup>11</sup> |
|                             | TBXA2R        | Ramatroban          | 6IUU <sup>12</sup> | 2.50           | Cardiovascular diseases, asthma <sup>13</sup>                                                   |
|                             | AT1R          | ZD-7155             | 4YAY <sup>14</sup> | 2.90           | Hypertension <sup>15</sup>                                                                      |
| Ion channels                | Nav1.7        | GX-936              | 5EK0 <sup>16</sup> | 3.53           | Pain <sup>17</sup>                                                                              |
|                             | GLIC          | Anesthetic ketamine | 4F8H <sup>18</sup> | 2.99           | General anesthetics <sup>18</sup>                                                               |
|                             | GABAA         | Flumazenil          | 6D6T <sup>19</sup> | 3.86           | Benzodiazepine overdose <sup>19</sup>                                                           |

**Table S2.** Number of active ligands for each target, obtained from DUD-E.

| Target        | Active ligands |
|---------------|----------------|
| AR            | 1,084          |
| ER $\alpha$   | 1,314          |
| PPAR $\gamma$ | 1,290          |
| VEGFR2        | 2,319          |
| ADORA2A       | 3,095          |

## Supplementary references

1. Hur, E.; Pfaff, S. J.; Payne, E. S.; Grøn, H.; Buehrer, B. M.; Fletterick, R. J., Recognition and accommodation at the androgen receptor coactivator binding interface. *PLoS biology* **2004**, *2* (9), e274.
2. Moore, J. T.; Collins, J. L.; Pearce, K. H., The nuclear receptor superfamily and drug discovery. *ChemMedChem: Chemistry Enabling Drug Discovery* **2006**, *1* (5), 504-523.
3. Brzozowski, A. M.; Pike, A. C.; Dauter, Z.; Hubbard, R. E.; Bonn, T.; Engström, O.; Öhman, L.; Greene, G. L.; Gustafsson, J.-Å.; Carlquist, M., Molecular basis of agonism and antagonism in the oestrogen receptor. *Nature* **1997**, *389* (6652), 753.
4. van Marrewijk, L. M.; Polyak, S. W.; Hijnen, M.; Kuruvilla, D.; Chang, M. R.; Shin, Y.; Kamenecka, T. M.; Griffin, P. R.; Bruning, J. B., SR2067 Reveals a Unique Kinetic and Structural Signature for PPARgamma Partial Agonism. *ACS Chem Biol* **2016**, *11* (1), 273-83.
5. Kukimoto-Niino, M.; Yoshikawa, S.; Takagi, T.; Ohsawa, N.; Tomabechi, Y.; Terada, T.; Shirouzu, M.; Suzuki, A.; Lee, S.; Yamauchi, T., Crystal structure of the Ca<sup>2+</sup>/calmodulin-dependent protein kinase kinase in complex with the inhibitor STO-609. *Journal of Biological Chemistry* **2011**, *286* (25), 22570-22579.
6. Penfold, L.; Woods, A.; Muckett, P.; Nikitin, A. Y.; Kent, T. R.; Zhang, S.; Graham, R.; Pollard, A.; Carling, D., CAMKK2 promotes prostate cancer independently of AMPK via increased lipogenesis. *Cancer research* **2018**, *78* (24), 6747-6761.
7. Chen, P.; Lee, N. V.; Hu, W.; Xu, M.; Ferre, R. A.; Lam, H.; Bergqvist, S.; Solowiej, J.; Diehl, W.; He, Y.-A., Spectrum and degree of CDK drug interactions predicts clinical performance. *Molecular cancer therapeutics* **2016**, *15* (10), 2273-2281.
8. Roskoski, R., Properties of FDA-approved small molecule protein kinase inhibitors. *Pharmacological research* **2019**.
9. McTigue, M.; Murray, B. W.; Chen, J. H.; Deng, Y.-L.; Solowiej, J.; Kania, R. S., Molecular conformations, interactions, and properties associated with drug efficiency and clinical performance among VEGFR TK inhibitors. *Proceedings of the National Academy of Sciences* **2012**, *109* (45), 18281-18289.
10. Cheng, R. K.; Segala, E.; Robertson, N.; Deflorian, F.; Doré, A. S.; Errey, J. C.; Fiez-Vandal, C.; Marshall, F. H.; Cooke, R. M., Structures of human A1 and A2A adenosine receptors with xanthines reveal determinants of selectivity. *Structure* **2017**, *25* (8), 1275-1285. e4.
11. de Lera Ruiz, M.; Lim, Y.-H.; Zheng, J., Adenosine A2A receptor as a drug discovery target. *Journal of medicinal chemistry* **2013**, *57* (9), 3623-3650.
12. Fan, H.; Chen, S.; Yuan, X.; Han, S.; Zhang, H.; Xia, W.; Xu, Y.; Zhao, Q.; Wu, B., Structural basis for ligand recognition of the human thromboxane A<sub>2</sub> receptor. *Nature chemical biology* **2019**, *15* (1), 27.
13. Hirata, T.; Narumiya, S., Prostanoid receptors. *Chemical reviews* **2011**, *111* (10), 6209-6230.
14. Zhang, H.; Unal, H.; Gati, C.; Han, G. W.; Liu, W.; Zatsepin, N. A.; James, D.; Wang, D.; Nelson, G.; Weierstall, U.; Sawaya, M. R.; Xu, Q.; Messerschmidt, M.; Williams, G. J.; Boutet, S.; Yefanov, O. M.; White, T. A.; Wang, C.; Ishchenko, A.; Tirupula, K. C.; Desnoyer, R.; Coe, J.; Conrad, C. E.; Fromme, P.; Stevens, R. C.; Katritch, V.; Karnik, S. S.; Cherezov, V., Structure of the Angiotensin receptor revealed by serial femtosecond crystallography. *Cell* **2015**, *161* (4), 833-44.
15. Dasgupta, C.; Zhang, L., Angiotensin II receptors and drug discovery in cardiovascular disease. *Drug discovery today* **2011**, *16* (1-2), 22-34.
16. Ahuja, S.; Mukund, S.; Deng, L.; Khakh, K.; Chang, E.; Ho, H.; Shriver, S.; Young, C.; Lin, S.; Johnson, J., Structural basis of Nav1.7 inhibition by an isoform-selective small-molecule antagonist. *Science* **2015**, *350* (6267), aac5464.
17. Vetter, I.; Deuis, J. R.; Mueller, A.; Israel, M. R.; Starobova, H.; Zhang, A.; Rash, L. D.; Mobli, M., Nav1.7 as a pain target—from gene to pharmacology. *Pharmacology & therapeutics* **2017**, *172*, 73-100.
18. Pan, J.; Chen, Q.; Willenbring, D.; Mowrey, D.; Kong, X.-P.; Cohen, A.; Divito, C. B.; Xu, Y.; Tang, P., Structure of the pentameric ligand-gated ion channel GLIC bound with anesthetic ketamine. *Structure* **2012**, *20* (9), 1463-1469.
19. Zhu, S.; Noviello, C. M.; Teng, J.; Walsh, R. M., Jr.; Kim, J. J.; Hibbs, R. E., Structure of a human synaptic GABA<sub>A</sub> receptor. *Nature* **2018**, *559* (7712), 67-72.
